# Supplementary material for: Inhibition of fatty acid oxidation enables heart regeneration in adult mice
Source: Nature. 2023 Sep 27;622(7983):619–26. doi: 10.1038/s41586-023-06585-5 (PMC10584682; doi:10.1038/s41586-023-06585-5)
Supplement: Supplementary file 6 — Source Data Fig. 2 [file 41586_2023_6585_MOESM6_ESM.xlsx]

## Sheet: Fig2.b
Fig2b	CtrlCre	Cpt1bcKO		p value
Total Fibrotic area (mm2)	1.00231	0.783		0.0002
	0.886	0.244921
	1.2146	0.225483
	1.054	0.893903
	1.31507	0.28848
		0.423
		0.349269
		0.502331
		0.396031
	Ctrl	Cpt1biKO		p value
Total Fibrotic area normalized to heart size	5.46553	3.2858		0.0004
	10.0549	1.20171
	6.04295	0.855629
	14.1764	5.98957
	11.8351	1.4899
		2.66809
		2.58959
		3.34173
		3.78588

## Sheet: Fig2.d
Fig2d	Ctrl	Cpt1biKO		p value
Total Fibrotic area (mm2)	1.10666	0.117979		0.0215
	0.524999	0.610275
	0.634736	0.51563
	0.337276	0.0874915
	0.492185	0.187901
	1.65213	0.127089
	0.201028	0.318113
	1.89712
	1.28616
	Ctrl	Cpt1biKO		p value
Total Fibrotic area normalized to heart size	10.8539	0.924223		0.0068
	4.35217	3.98018
	5.45362	2.86627
	3.80171	0.57716
	4.58718	1.09588
	13.5746	1.1627
	2.11677	2.55214
	15.6616
	12.7428

## Sheet: Fig2.e
Fig2e	CtrlCre	Cpt1bcKO		p value
AAR	60.625	70.337		0.2194
	70.4915	63.286
	81.0917	83.549
	90.9401	49.29
	64.1102	52.856
	75.562
	CtrlCre	Cpt1bcKO		p value
IF of AAR	65.822	1.11034		<0,0001
	59.697	22.5662
	40.9832	5.79944
	63.5156	14.1092
	68.0865	19.5098
	55.9181

## Sheet: Fig2.f
Fig2f	Ctrl	Cpt1biKO		p value
AAR	53.0206	56.3178		0.3745
	57.6879	69.6515
	51.7163	77.5106
	71.3129	47.5402
		78.9772
	Ctrl	Cpt1biKO		p value
IF of AAR	51.8145	8.22278		0.0003
	83.6757	9.43589
	52.1486	26.9594
	63.953	12.3374
		12.2392

## Sheet: Fig2.h
Fig2h	Ctrl	Cpt1biKO		p value
Total Fibrotic area (mm2)	1.80579	1.86912		0.0437
	1.06504	0.660524
	3.45	2.24192
	2.81	0.45923
	3.75675	1.24565
	2.61813
	Ctrl	Cpt1biKO		p value
Total Fibrotic area normalized to heart size	17.39	15.08		0.0142
	10.91	8.45
	27.38	16.69
	25.97	4.15
	31.03	8.52014
	22.08

## Sheet: Fig2.i
Fig2i
	Ctrl								Cpt1biKO								Tukey's multiple comparisons test	Summary	Adjusted P Value
Before I/R	100	100	100	100	100	100		100	100	100	100	100	100				Before I/R:Ctrl vs. 7 days post I/R:Ctrl	****	<0,0001
7 days post I/R	82.1315	67.8139	39.0689	64.4875	26.5872	50.9191		59.1176	73.193	79.6805	53.42	60.7959	29.7688				Before I/R:Ctrl vs. 14 days post I/R:Ctrl	****	<0,0001
14 days post I/R	48.4911	4.61108	39.3543	12.078	20.371			33.5026	38.0486	47.5111	48.365	73.8847					Before I/R:Ctrl vs. 28 days post I/R:Ctrl	****	<0,0001
28 days post I/R	42.122	11.6382	38.1759	35.762				83.0027	94.7137	91.6976	75.9674	101.228					Before I/R:Cpt1biKO vs. 7 days post I/R:Cpt1biKO	***	0.0004
																	Before I/R:Cpt1biKO vs. 14 days post I/R:Cpt1biKO	****	<0,0001
																	Before I/R:Cpt1biKO vs. 28 days post I/R:Cpt1biKO	ns	0.9083
																	7 days post I/R:Ctrl vs. 7 days post I/R:Cpt1biKO	ns	0.9995
																	14 days post I/R:Ctrl vs. 14 days post I/R:Cpt1biKO	ns	0.1817
																	28 days post I/R:Ctrl vs. 28 days post I/R:Cpt1biKO	****	<0,0001
